# Supplementary material for: Defect state of indium-doped bismuth molybdate nanosheets for enhanced photoreduction of chromium(vi) under visible light illumination
Source: Royal Society of Chemistry journal article supplement (doi:10.1039/c8dt01807c), 2018-01-01
Supplement: c8dt01807c1.pdf [file c8dt01807c1.pdf]

*Supporting information*

**Defect-sate of Indium Doped Bismuth Molybdate Nanosheets for  
Enhanced Photoreduction of Chromium (VI) under Visible Light  
Illumination**

Zhongfu Li <sup>a, b, c †</sup>, Zhaohui Wu <sup>b, †</sup>, Shumin Zhang <sup>a, b</sup>, Jie Shen <sup>b</sup>, Yi Du <sup>c</sup>, Long Wan <sup>a, \*</sup>, Shiyong Zhang <sup>b, \*</sup>

a College of Materials Science and Engineering, Hunan University, Changsha, 410082, People's Republic of  
China

b Hunan Key Laboratory of Applied Environmental Photocatalysis, Changsha University, Changsha 410005,  
Hunan Province, People's Republic of China

c Key Laboratory of Processing and Testing Technology of Glass & Functional Ceramics of Shandong Province,  
Qilu University of Technology (Shandong Academy of Sciences), Jinan 250353, People's Republic of China

† These authors contributed equally to this work.

**Corresponding author**

\*Shiyong Zhang Tel: +86-731-84261297. E-mail: [cdzhangshiyong@163.com](mailto:cdzhangshiyong@163.com).

\* Long Wan Tel: +86-13055177892. E-mail: [wanlong1799@126.com](mailto:wanlong1799@126.com).

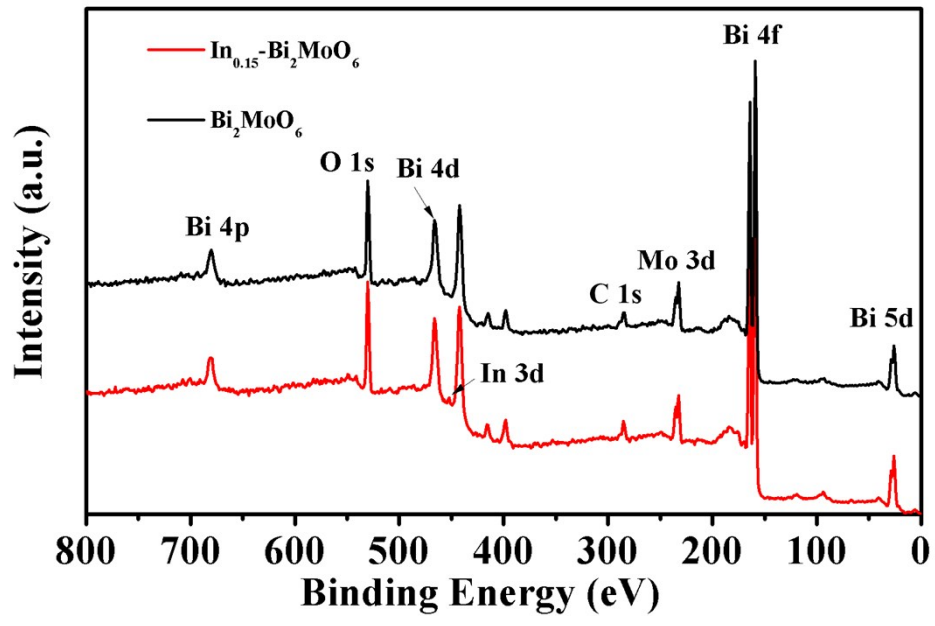

Figure S1. Survey spectrum of pure  $\text{Bi}_2\text{MoO}_6$  and  $\text{In}_{0.15}\text{-Bi}_2\text{MoO}_6$  sample.

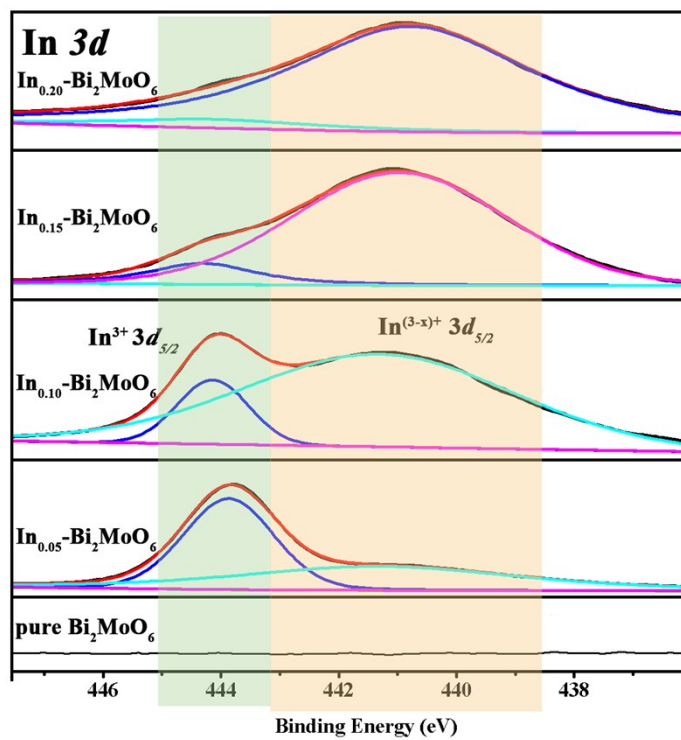

**Figure S2** Evolution of In  $3d_{5/2}$  spectrums of prepared samples with different indium doped amount.

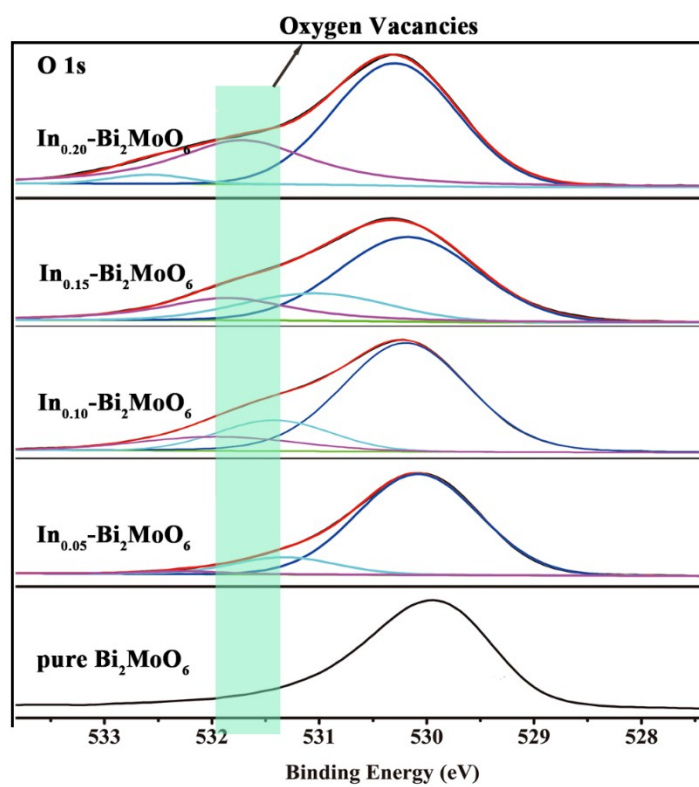

**Figure S3.** Evolution of O 1s spectrums of prepared samples with different indium doped amount.

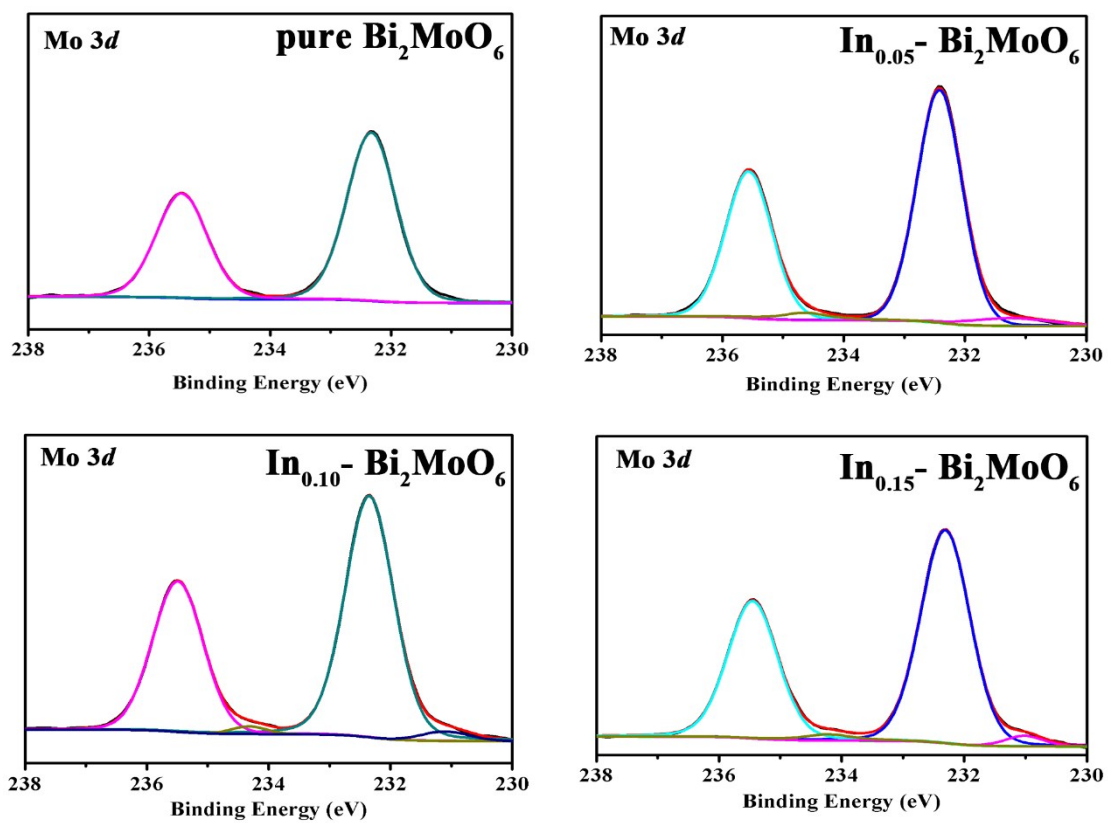

**Figure S4.** Evolution of Mo 3d spectrums of prepared samples with different indium doped amount

**Table S1.** Variation of Mo-O bond calculated from Raman spectrum of prepared samples.

|                                | Pure Bi <sub>2</sub> MoO <sub>6</sub> | In <sub>0.15</sub> -Bi <sub>2</sub> MoO <sub>6</sub> | $\Delta$ shift | Mo-O Bond Type        |
|--------------------------------|---------------------------------------|------------------------------------------------------|----------------|-----------------------|
| Location 1 (cm <sup>-1</sup> ) | 717.50                                | 713.77                                               | -3.73          | equatorial octahedron |
| Band length 1 (Å)              | 1.84529                               | 1.84780                                              | +0.00251       |                       |
| Location 2 (cm <sup>-1</sup> ) | 796.59                                | 794.13                                               | -2.46          | vertex octahedron     |
| Band length 2 (Å)              | 1.79486                               | 1.79634                                              | +0.00148       |                       |
| Location 3 (cm <sup>-1</sup> ) | 845.56                                | 849.22                                               | +3.66          | vertex octahedron     |
| Band length 3 (Å)              | 1.76607                               | 1.76398                                              | -0.00209       |                       |

- presents moving toward low Raman shift or the reduce of bond length

+ presents moving toward high Raman shift or the increase of bond length
